1 **Glucocorticoid treatment exacerbates mycobacterial infection by**  
2 **reducing the phagocytic capacity of macrophages**

3 **Glucocorticoids and zebrafish TB**

4 Yufei Xie, Annemarie H. Meijer, Marcel J.M. Schaaf\*

5 Institute of Biology, Leiden University, Leiden, The Netherlands

6

7 \* To whom correspondence should be addressed. Tel: (+31)715274975; Fax: (+31)715275088; Email:  
8 m.j.m.schaaf@biology.leidenuniv.nl

9

10 **Key words:** glucocorticoids, *Mycobacterium marinum*, macrophage, phagocytosis, zebrafish,  
11 tuberculosis

12

13 **Summary statement:**

14 Using a zebrafish tuberculosis model, we show that glucocorticoids decrease phagocytosis by  
15 macrophages, thereby increasing the bacterial burden. This may explain the glucocorticoid-induced  
16 increase in susceptibility to tuberculosis in humans.

## 17 **Abstract**

18 Glucocorticoids are effective drugs for treating immune-related diseases, but prolonged therapy is  
19 associated with an increased risk of various infectious diseases, including tuberculosis. In this study,  
20 we have used a larval zebrafish model for tuberculosis, based on *Mycobacterium marinum* (*Mm*)  
21 infection, to study the effect of glucocorticoids. Our results show that the synthetic glucocorticoid  
22 beclomethasone increases the bacterial burden and the dissemination of a systemic *Mm* infection.  
23 The exacerbated *Mm* infection was associated with a decreased phagocytic activity of macrophages,  
24 higher percentages of extracellular bacteria, and a reduced rate of infected cell death, whereas the  
25 bactericidal capacity of the macrophages was not affected. The inhibited phagocytic capacity of  
26 macrophages was associated with suppression of the transcription of genes involved in phagocytosis  
27 in these cells. The decreased bacterial phagocytosis by macrophages was not specific for *Mm*, since it  
28 was also observed upon infection with *Salmonella* Typhimurium. In conclusion, our results show that  
29 glucocorticoids inhibit the phagocytic activity of macrophages, which may increase the severity of  
30 bacterial infections like tuberculosis.

## 31 Introduction

32 Glucocorticoids (GCs) are a class of steroid hormones that are secreted upon stress. The main  
33 endogenous GC in our body, cortisol, helps our bodies adapt to stressful situations and for this  
34 purpose it regulates a wide variety of systems, like the immune, metabolic, reproductive,  
35 cardiovascular and central nervous system. These effects are mediated by an intracellular receptor,  
36 the glucocorticoid receptor (GR), which acts as a ligand-activated transcription factor. Synthetic GCs  
37 are widely prescribed to treat various immune-related diseases due to their potent suppressive  
38 effects on the immune system. However, prolonged therapy with these pleiotropic steroids evokes  
39 severe side effects, such as osteoporosis and diabetes mellitus (Buckley and Humphrey, 2018; Suh  
40 and Park, 2017). Importantly, the therapeutic immunosuppressive effect of GCs may lead to  
41 infectious complications because of the compromised immune system (Caplan et al., 2017; Dixon et  
42 al., 2011; Fardet et al., 2016). Similarly, after chronic stress an increased susceptibility to infectious  
43 diseases has been observed, due to the high circulating levels of cortisol. In order to better  
44 understand these complex effects of GCs, more research is required into how GCs influence the  
45 susceptibility to infections and the course of infectious diseases.

46 Tuberculosis (TB) is the most prevalent bacterial infectious disease in the world, caused by the  
47 pathogen *Mycobacterium tuberculosis* (*Mtb*). Despite the efforts made to reach the “End TB Strategy”  
48 of the World Health Organization, *Mtb* still infects approximately one-quarter of the world's  
49 population and caused an estimated 1.5 million deaths in 2018, which makes it one of the top 10  
50 causes of death globally (Houben and Dodd, 2016; World Health Organization, 2019). The major  
51 characteristic of *Mtb* infection is the formation of granulomas containing infected and non-infected  
52 immune cells (Furin et al., 2019). Most *Mtb*-infected people develop a latent, noncontagious  
53 infection and do not show any symptoms, with the bacteria remaining inactive, while contained  
54 within granulomas (Drain et al., 2018; Lin and Flynn, 2010). About 5-10% of the carriers develop a  
55 clinically active TB disease associated with a loss of granuloma integrity (Lin and Flynn, 2010; Parikka  
56 et al., 2012). Among those TB patients, the majority manifest a lung infection and around 20% shows  
57 infection in other organs like the central nervous system, pleura, urogenital tracts, bones and joints,  
58 and lymph nodes (Kulchavenya, 2014). Antibiotics are currently the mainstay for TB treatment, but  
59 since antibiotic resistance is rising and an effective vaccine against latent or reactivated TB is still  
60 lacking, alternative therapies to control TB are needed (Hawn et al., 2013).

61 GCs are known to modulate the pathogenesis of TB, but their effects are highly complicated. The use  
62 of GCs is considered as a risk factor for TB. Patients who are being treated with GCs have an  
63 approximately 5-fold increased risk for developing new TB (Jick et al., 2006), and treatment with a

64 moderate or high dose of GCs is associated with an increased risk of activation of latent TB  
65 (Bovornkitti et al., 1960; Kim et al., 1998; Schatz et al., 1976). Consequently, a tuberculin skin test  
66 (TST) for screening latent TB is recommended before starting GC therapy (Jick et al., 2006). Moreover,  
67 chronic stress which is associated with increased circulating levels of the endogenous GC cortisol, has  
68 been shown to be associated with a higher incidence of TB (Lerner, 1996).

69 Despite the generally detrimental effects of GCs on TB susceptibility and progression, certain types of  
70 TB patients are treated with GCs. Chronic TB patients may require GCs for treatment of other  
71 disorders, and it has been shown that adjunctive GC therapy may have beneficial effects.  
72 Traditionally, adjunctive GC with standard anti-TB therapy has been used for prevention of  
73 inflammatory complications in patients with tuberculous meningitis, pericarditis, and pleurisy (Alzeer  
74 and FitzGerald, 1993; Evans, 2008; Kadiravan and Deepanjali, 2010; Singh and Tiwari, 2017). It has  
75 been reported that adjunctive GC therapy could improve the probability of survival in tuberculous  
76 meningitis and pericarditis (Strang et al., 2004; Thwaites et al., 2004; Torok et al., 2011; Wiysonge et  
77 al., 2017). In case of pulmonary TB, the most common form of TB, adjunctive GC therapy is  
78 recommended in advanced tuberculosis since broad and significant clinical benefits have been  
79 demonstrated (Muthuswamy et al., 1995; Smego and Ahmed, 2003).

80 Although GCs are being used for adjunctive therapy, the beneficial effects of GC treatment are still  
81 under debate. For tuberculous pleurisy TB, the efficacy of GCs is still controversial and for meningitis  
82 and pericarditis, information on the GC effects is still incomplete (Prasad et al., 2016; Ryan et al.,  
83 2017; Singh and Tiwari, 2017; Wiysonge et al., 2017). A review regarding clinical trials for pulmonary  
84 TB showed that, although adjunctive GC therapy appears to have short-term benefits, it is not  
85 maintained in the long-term (Critchley et al., 2014). An explanation for the complexity of the effects  
86 of GC therapy in TB has been offered by Tobin et al. (2012). They showed that patients suffer from TB  
87 as a result of either a failed or an excessive immune response to the mycobacterial infection, and  
88 that only the subset of TB meningitis patients with an excessive response, showing a  
89 hyperinflammatory phenotype (in their study as a result of a polymorphism in the *LTA4H* gene),  
90 benefited from adjunctive GC therapy. It was suggested that GCs may also be beneficial for similar  
91 subgroups of patients suffering from other forms of TB (Tobin et al., 2012).

92 The complex interplay between GC actions and TB underscores the need for a better understanding  
93 of the effects of GCs on mycobacterial infection. In the present study we have studied these effects  
94 using *Mycobacterium marinum* (*Mm*) infection in zebrafish as a model system. *Mm* is a species  
95 closely related to *Mtb* that can infect zebrafish and other cold-blooded animals naturally, causing a  
96 TB-like disease (Tobin and Ramakrishnan, 2008). Infection of zebrafish larvae with *Mm* provides an

97 animal model system that mimics hallmark aspects of *Mtb* infection in humans and is widely used for  
98 research into mechanisms underlying the course of this disease (Cronan and Tobin, 2014; Meijer,  
99 2016; Ramakrishnan, 2013). Like *Mtb*, *Mm* is able to survive and replicate within macrophages and,  
100 in later stages of infection, induces the formation of granulomas (Davis et al., 2002). The  
101 transparency of zebrafish at early life stages makes it possible to perform non-invasive long-term live  
102 imaging, which has been used to reveal the earliest stages of granuloma formation (Davis and  
103 Ramakrishnan, 2009). In addition, the availability of different transgenic and mutant zebrafish lines  
104 and the efficient application of molecular techniques allow us to exploit this zebrafish *Mm* infection  
105 model optimally to study both the host factors and bacterial factors involved in mycobacterial  
106 infection processes (Meijer, 2016; Tobin and Ramakrishnan, 2008; van Leeuwen et al., 2015). For  
107 example, zebrafish studies revealed that infected macrophages can detach from a granuloma and  
108 facilitate dissemination to new locations (Davis and Ramakrishnan, 2009). Moreover, the study of an  
109 *Ita4h* mutant zebrafish line showed that the polymorphism in the *LTA4H* gene is associated with the  
110 susceptibility to mycobacterial diseases and the response to adjunctive GC therapy in human,  
111 representing a prime example of translational research (Tobin et al., 2012; Tobin et al., 2010).

112 The zebrafish has proven to be a suitable model for studying the effects of GCs, since the GC  
113 signaling pathway is very well conserved between zebrafish and humans. Both humans and zebrafish  
114 have a single gene encoding the GR, and the organization of these genes is highly similar (Alsop and  
115 Vijayan, 2008; Schaaf et al., 2009; Stolte et al., 2006). Both the human and the zebrafish gene  
116 encodes two splice variants, the  $\alpha$ -isoform, the canonical receptor, and the  $\beta$ -isoform, which has no  
117 transcriptional activity (Schaaf et al., 2009). The DNA binding domain (DBD) and ligand binding  
118 domain (LBD) of the canonical  $\alpha$ -isoform of the human and zebrafish GR share similarities of 98.4%  
119 and 86.5% respectively (Schaaf et al., 2009). The zebrafish GR  $\alpha$ -isoform, hereafter referred to as Gr,  
120 mediates GC effects that have traditionally been observed in humans and other mammals as well,  
121 like the effects on metabolism (Chatzopoulou et al., 2015) and the suppression of the immune  
122 system (Chatzopoulou et al., 2016). This makes the zebrafish an ideal model to study the mechanisms  
123 of GC action *in vivo* (Facchinello et al., 2017; Faught and Vijayan, 2019). In a recent study, we have  
124 demonstrated that GC treatment inhibits the activation of the immune system in zebrafish larvae  
125 upon wounding (Xie et al., 2019). The migration of the neutrophils and the differentiation of  
126 macrophages was attenuated upon treatment with the synthetic GC.

127 In the present study, to investigate the functional consequences of the previously observed GC  
128 effects on immune cells, we have investigated how GCs modulate the course of an *Mm* infection in  
129 zebrafish larvae. We demonstrate that beclomethasone increases the level of *Mm* infection and  
130 tissue dissemination. This increased *Mm* infection can be explained by an inhibition of the phagocytic

131 activity of macrophages by beclomethasone, which did not affect the microbicidal capacity of these  
132 cells. The inhibitory effect of beclomethasone on phagocytosis, which most likely results from Gr  
133 interfering with the transcription of genes required for phagocytosis, results in a higher percentage  
134 of extracellular bacteria, which eventually leads to an exacerbation of the *Mm* infection.

135

## 136 **Results**

### 137 **Beclomethasone increases mycobacterial infection through Glucocorticoid receptor (Gr)** 138 **activation**

139 To study the effect of GC treatment on *Mm* infection in zebrafish, we pretreated zebrafish embryos  
140 with beclomethasone and infected them intravenously with fluorescently labelled *Mm*. At 4 days  
141 post infection (dpi), the bacterial burden was assessed by quantification of pixel intensities of  
142 fluorescence microscopy images. We found that the bacterial burden increased by 2.3 fold when  
143 embryos were treated with 25  $\mu$ M beclomethasone compared with the vehicle-treated group (Figure  
144 1 A, C). Beclomethasone treatment at lower concentrations of 0.04, 0.2, 1 and 5  $\mu$ M did not affect  
145 the bacterial burden. Therefore, a concentration of 25  $\mu$ M beclomethasone was used in subsequent  
146 experiments. We have previously shown that this concentration effectively reduces wound-induced  
147 leukocyte migration in zebrafish as well (Xie et al., 2019).

148 To demonstrate that the beclomethasone-induced increase in bacterial burden was not due to a  
149 general toxicity of beclomethasone but mediated specifically by the Gr, we used the GR antagonist  
150 RU-486. The results of these experiments showed that the beclomethasone-induced increase in  
151 bacterial burden at 4 dpi was abolished when co-treatment with RU-486 was applied (Figure 1 B, D),  
152 which indicates that the effect of beclomethasone requires activation of Gr. No significant difference  
153 was observed when the RU-486-treated larvae were compared to the vehicle-treated group. In  
154 conclusion, beclomethasone increases the level of *Mm* infection in zebrafish larvae and this effect is  
155 mediated by Gr.

### 156 **Beclomethasone treatment leads to a higher infection and dissemination level without** 157 **influencing the microbicidal capacity of macrophages**

158 Subsequently, we analyzed the effect of beclomethasone on *Mm* infection in more detail. The total  
159 bacterial burden (Figure 2 A), the number of bacterial clusters per individual (Figure 2 B) and the  
160 average size of the bacterial clusters (Figure 2 C) were quantified at 1, 2, 3 and 4 dpi. The results

161 showed that the difference in bacterial burden between the beclomethasone-treated group and the  
162 vehicle group was not significant at 1-3 dpi, but that a significant difference was observed at 4 dpi  
163 ( $6186.1 \pm 626.5$  vs  $2870.5 \pm 235.0$ ). However, a significant increase in the number of bacterial clusters  
164 in the beclomethasone-treated group was already detected at 3 dpi ( $28.3 \pm 1.9$  vs  $18.1 \pm 1.5$  in the  
165 vehicle group) which was sustained at 4 dpi ( $64.2 \pm 3.5$  vs  $35.4 \pm 2.6$ ). The size of the bacterial clusters  
166 at 4 dpi was also increased in the beclomethasone-treated group compared to the cluster size in the  
167 vehicle-treated group ( $741.6 \pm 58.3$  vs  $498.3 \pm 45.7$ ). The increase in the number of bacterial clusters  
168 indicates an increased dissemination of the infection due to beclomethasone treatment. We  
169 confirmed this effect of beclomethasone on bacterial dissemination using hindbrain infection (Figure  
170 2 D, E). Following *Mm* injection into the hindbrain ventricle,  $66.1 \pm 2.0\%$  of embryos in the vehicle-  
171 treated group showed disseminated infection in tissues of the head and tail at 24 hours post  
172 infection (hpi), while a significantly higher number ( $76.4 \pm 2.6\%$ ) showed this dissemination in the  
173 beclomethasone-treated group.

174 To study whether the increased infection and dissemination was related to the microbicidal capacity  
175 of macrophages, we injected *Mm Δerp* bacteria which are deficient for growth inside macrophages  
176 (Clay et al., 2008). No significant difference was observed for the number of *Mm* clusters (Figure 3A)  
177 and the percentage of *Mm* inside macrophage (Figure 3B) between the beclomethasone-treated  
178 group and the vehicle-treated group. To assess the ability of macrophages to kill bacteria, we  
179 quantitated the percentage of bacteria-containing macrophages that contained only 1-10 bacteria in  
180 the tail region at 44 hpi (Sommer et al., 2020). There was no significant difference in this percentage  
181 between the vehicle-treated group ( $82.0 \pm 4.9\%$ ) and the beclomethasone-treated group ( $81.6 \pm 5.0\%$ )  
182 (Figure 3C-E). Taken together, these findings indicate that beclomethasone treatment leads to a  
183 higher overall *Mm* infection level and increased dissemination, and that these effects are not related  
184 to an altered microbicidal capacity of macrophages.

### 185 **Beclomethasone activation of Gr inhibits macrophage phagocytic activity**

186 Since previous studies showed that increased *Mm* infection could be related to decreased phagocytic  
187 activity of macrophages in zebrafish (Benard et al., 2014), we studied the effect of beclomethasone  
188 on phagocytosis. We used the *Tg(mpeg1:mCherry-F)* line in which macrophages are fluorescently  
189 labeled, and assessed phagocytic activity of macrophages by determining the percentage of *Mm* that  
190 were internalized by macrophages in the yolk sac area (Benard et al., 2014) (Figure 4 A-C). In the  
191 vehicle-treated group, the percentage of phagocytosed *Mm* was  $17.4 \pm 3.5\%$  at 5 minutes post  
192 infection (mpi) and gradually increased to  $41.9 \pm 4.9\%$  and  $52.8 \pm 5.2\%$  at 15 and 25 mpi respectively. At  
193 each of these time points, a lower percentage of *Mm* were phagocytosed in the beclomethasone-

194 treated group ( $4.6 \pm 1.6\%$  at 5 mpi,  $25.7 \pm 4.7\%$  at 15 mpi and  $34.0 \pm 5.2\%$  at 25 mpi). In addition, we  
195 studied the involvement of Gr in the beclomethasone-induced inhibition of phagocytosis at 5 mpi, by  
196 co-treatment with the GR antagonist RU-486 (Figure 4 D). We found that the decreased phagocytic  
197 activity that was observed upon beclomethasone treatment was abolished when larvae were co-  
198 treated with RU-486, indicating that the inhibition of phagocytosis by beclomethasone is mediated  
199 by Gr.

200 Gr generally acts as a transcription factor, modulating the transcription rate of a wide variety of  
201 genes. To study whether phagocytosis could be modulated by altering the process of protein  
202 synthesis, we blocked *de novo* protein synthesis by treatment with cycloheximide (Figure 4 D). We  
203 observed that the phagocytic activity of macrophages at 5 mpi was decreased by the cycloheximide  
204 treatment ( $3.4 \pm 1.0\%$  vs  $11.1 \pm 1.8\%$  in the vehicle group). These data demonstrate that phagocytosis  
205 depends on *de novo* protein synthesis, and suggest that modulating transcription could be the  
206 mechanism underlying the inhibition of phagocytosis by Gr.

#### 207 **Beclomethasone treatment results in fewer intracellular bacteria and limits infected cell** 208 **death**

209 To further analyze the possible mechanisms underlying the beclomethasone-induced increase in the  
210 *Mm* infection level, we assessed the percentage of bacteria that are present inside and outside  
211 macrophages in the caudal hematopoietic tissue (CHT) at 48 hpi using *Mm* infection in the  
212 *Tg(mpeg1:GFP)* line. The results showed that beclomethasone treatment resulted in a decreased  
213 percentage of intracellular bacteria ( $23.8 \pm 3.0\%$ ) compared to the percentage in the vehicle-treated  
214 group ( $36.5 \pm 3.6\%$ ) (Figure 5 A, C). This result was in line with the observed decrease in phagocytosis  
215 at earlier stages of infection. Finally, we used terminal deoxynucleotidyl transferase dUTP nick end  
216 labelling (TUNEL) staining to detect cell death, and we performed this staining at 48 hpi (Zhang et al.,  
217 2019). In the beclomethasone-treated group, the percentage of *Mm* that were colocalized with  
218 TUNEL staining ( $9.4 \pm 1.6\%$ ) was significantly lower compared to the percentage of the vehicle group  
219 ( $17.2 \pm 2.3\%$ ) (Figure 5 B, D). These data suggest that the observed inhibition of phagocytosis upon  
220 beclomethasone treatment causes a decrease in the percentage of intracellular bacteria, which  
221 underlies the lower numbers of macrophages undergoing cell death as a result of the *Mm* infection.

#### 222 **Beclomethasone inhibits phagocytosis-related gene expression in macrophages**

223 To unravel the molecular mechanisms underlying the beclomethasone-induced inhibition of the  
224 phagocytic activity of macrophages, we performed qPCR analysis on FACS-sorted macrophages  
225 derived from 28 hpf larvae after 2 h of beclomethasone treatment. To determine the phenotype of



226 the sorted macrophages, the expression of a classic pro-inflammatory gene, *tnfa*, was measured  
227 (Martinez and Gordon, 2014; Nguyen-Chi et al., 2015). The levels of *tnfa* expression were significantly  
228 lower after beclomethasone treatment (Figure 6 A), in agreement with previously reported  
229 transcriptome analysis (Xie et al., 2019). In addition, we measured the expression levels of seven  
230 phagocytosis-related genes, *sparcl1*, *uchl1*, *ube2v1*, *marcksa*, *marcksb*, *bsg* and *tubb5* (Banerjee et al.,  
231 2019; Carballo et al., 1999; Jeon et al., 2010) (Figure 6 B-H). The expression levels of four of these  
232 genes, *sparcl1*, *uchl1*, *marcksa* and *marcksb*, were inhibited by beclomethasone treatment, while the  
233 levels of the other three (*ube2v1*, *bsg* and *tubb5*) were not affected. These data suggest that  
234 beclomethasone inhibits the phagocytic activity of macrophages by suppressing the transcription of  
235 phagocytosis-related genes in these cells.

### 236 **Effect of Beclomethasone on the phagocytosis of *Salmonella* Typhimurium**

237 To study whether the beclomethasone-induced inhibitory effect on macrophage phagocytosis of *Mm*  
238 can be generalized to other bacterial infections, we analyzed the effect of beclomethasone on  
239 infection with *Salmonella* Typhimurium, which is also an intracellular pathogen, but belongs to the  
240 gram-negative class. We quantified the percentages of bacteria phagocytosed by macrophages at  
241 different time points after infection in the *Tg(mpeg1:GFP)* fish line (Figure 7). In the vehicle group,  
242 the percentage of phagocytosed *Salmonella* Typhimurium increased from 5.7±0.7% at 10 mpi to  
243 9.0±1.2% at 30 mpi and 17.9±1.7% at 60 mpi, and these percentages were significantly lower in the  
244 beclomethasone-treated group at all time points (3.1±0.5% at 10 mpi, 6.5±1.0% at 30 mpi and  
245 10.0±1.4% at 60 mpi). These data demonstrate that the inhibitory effect of beclomethasone on the  
246 phagocytic activity of macrophages is not specific for *Mm*, but can also be observed for a distantly  
247 related *Salmonella* species.

248

## 249 **Discussion**

250 Synthetic GCs are widely prescribed to treat various immune-related diseases, but their clinical use is  
251 limited by the severe side effects evoked by prolonged therapy, including a higher susceptibility to TB  
252 (Caplan et al., 2017; Jick et al., 2006). In order to gain more insight into the mechanism underlying  
253 this GC effect, we used the zebrafish *Mm* infection model, which mimics human TB, and studied the  
254 effect of GC treatment on the development of the infection. We showed that GC treatment  
255 increased the level of *Mm* infection, which was reflected in the overall bacterial burden, the size and  
256 number of bacterial clusters and the level of dissemination. Since we found that GC treatment

257 inhibited the phagocytic activity but not the microbicidal capacity of macrophages, we propose that  
258 the GC-induced increase in infection susceptibility is due to the inhibition on phagocytosis. Analysis  
259 of the transcription level of phagocytosis-related genes in macrophages suggested that the inhibition  
260 of phagocytic activity by GCs is mediated by Gr interfering with phagocytosis-related gene  
261 transcription. As a result of the lower phagocytic activity of the macrophages, the percentage of  
262 intracellular bacteria is decreased, which results in a lower level of cell death due to the *Mm*  
263 infection and exacerbated growth of the extracellular bacterial fraction. Finally, we showed that GC  
264 treatment not only limited phagocytosis of mycobacteria, but also of a *Salmonella* species, which  
265 suggests that the decrease in phagocytic activity may also explain the increased susceptibility to  
266 other bacterial infections that is commonly observed in patients receiving GC therapy (Caplan et al.,  
267 2017; Dixon et al., 2011; Fardet et al., 2016).

268 Upon bacterial infections, macrophages are the first responders of the immune system. In humans,  
269 *Mtb* generally infects lungs due to its air transmission properties and in the lungs it is taken up by  
270 alveolar macrophages within the first few days. In later stages, *Mtb* replicates, translocates to  
271 secondary loci and aggregates into granulomas with other attracted immune cells (Cambier et al.,  
272 2014; Russell, 2011; Srivastava et al., 2014). Consistently, in the zebrafish model, *Mm* is  
273 predominantly phagocytosed by macrophages within 30-60 min after intravenous infection in  
274 embryos, leading to initial stages of granuloma formation in the next few days (Benard et al., 2014;  
275 Davis et al., 2002). The phagocytosis activity and microbicidal capacity of macrophages have both  
276 been shown to be important for dealing with *Mm* infection (Benard et al., 2014; Clay et al., 2007).  
277 Interestingly, in our study we found that the microbicidal capacity of macrophages was not affected  
278 by GC treatment, which suggests that the inhibition of macrophage phagocytosis is a specific effect  
279 of GCs targeted at the uptake of pathogens rather than a global suppression of anti-microbial  
280 processes in macrophages.

281 Our study in the zebrafish model provides *in vivo* evidence for GC interference with macrophage  
282 phagocytosis that confirms results from various other studies. In line with our results, it has  
283 previously been shown that GCs decrease the phagocytosis of several *Escherichia coli* strains by  
284 human monocyte-derived (THP-1) macrophages and by murine bone marrow-derived macrophages  
285 (BMDMs) (Olivares-Morales et al., 2018). Similarly to our results, in this study the reduced  
286 phagocytosis activity was accompanied by a decreased expression of genes involved in phagosome  
287 formation including *MARCKS* and pro-inflammatory genes like *TNF* (Olivares-Morales et al., 2018). In  
288 earlier studies, decreased macrophage phagocytosis of carbon particles was observed *in vivo*, in GC-  
289 treated rats and rheumatoid arthritis patients (Jessop et al., 1973; Vernon-Roberts et al., 1973).

290 In contrast to our results on phagocytosis of mycobacteria, in other studies GC treatment has been  
291 shown to enhance the phagocytosis activity of macrophages. Upon GC exposure, increased  
292 phagocytosis of human monocyte-derived macrophages was observed for *Haemophilus influenzae*  
293 and *Streptococcus pneumoniae* (Taylor et al., 2010), and *Staphylococcus aureus* (van der Goes et al.,  
294 2000). This increased phagocytic activity would be in line with the well-established GC-induced  
295 enhancement of the phagocytosis of apoptotic neutrophils, which has been observed in,  
296 differentiated THP-1 macrophages, through stimulation of a protein S/Mer tyrosine kinase  
297 dependent pathway (Liu et al., 1999; McColl et al., 2009; Zahuczky et al., 2011), and in mouse  
298 alveolar macrophages (McCubbrey et al., 2012). This effect is considered to play an important role in  
299 GCs actively promoting the resolution of inflammation and reflects the GC-enhanced differentiation  
300 of macrophages to an anti-inflammatory phenotype (Busillo and Cidlowski, 2013; Ehrchen et al.,  
301 2019). Interestingly, GC treatment does not enhance the phagocytosis capacity in differentiated THP-  
302 1 macrophages of latex beads or apoptotic cells (Zahuczky et al., 2011). Most likely, the effects of GCs  
303 on the phagocytic activity of macrophages are highly dependent on the differentiation status of the  
304 cells, the particles they encounter and the tissue environment.

305 Our study revealed an inhibitory effect of GCs on four phagocytosis-related genes in FACS-sorted  
306 macrophages: *sparcl-1*, *uchl-1*, *marcksa* and *marcksb*. Among those genes, the human and mouse  
307 homologs of *sparcl-1* and *uchl-1* were reported to have a phagocytosis-promoting activity (Banerjee  
308 et al., 2019; Jeon et al., 2010). In human THP-1-derived macrophages, MARCKS plays a role in  
309 cytoskeletal remodeling and phagosome formation, and in line with our study the *MARCKS* gene  
310 expression was found to be inhibited by dexamethasone treatment (Carballo et al., 1999; Olivares-  
311 Morales et al., 2018). Together with our observation that phagocytosis is dependent on *de novo*  
312 protein synthesis, these results support the idea that GC treatment inhibits the phagocytosis activity  
313 of macrophages through interfering with transcription of genes that stimulate the phagocytic activity.

314 After internalization by macrophages, *Mm* are exposed to a bactericidal environment (Lesley and  
315 Ramakrishnan, 2008). Some bacteria may be killed by macrophages, while others may proliferate  
316 mediated by virulence determinants like Erp and RD1 (Clay et al., 2008; Lesley and Ramakrishnan,  
317 2008; Lewis et al., 2003). When the macrophages are incapable of containing the bacteria, they  
318 undergo cell death leading to recruitment of more macrophages (Davis and Ramakrishnan, 2009). In  
319 our study, GC treatment led to a lower percentage of intracellular *Mm* at later stages, consistent with  
320 the decreased phagocytosis at early time points, and consequently less *Mm*-related cell death. The  
321 GC treatment may also directly affect cell death, since in a recent study it was demonstrated that GCs  
322 inhibit necrosis of various *Mtb* infected mouse and human cell types by activating MKP-1, which  
323 suppresses a pathway involving p38 MAPK activation ultimately leading to a loss of mitochondrial

324 integrity (Gräb et al., 2019). The increased numbers of extracellular bacteria could traverse  
325 endothelial barriers directly and grow more rapidly in a less restrictive environment outside  
326 macrophages, which may explain our observation of a higher bacterial burden induced by GC  
327 treatment.

328 Based on our results, it may seem surprising that adjunctive GC therapy is often beneficial to TB  
329 patients, and even increases survival among tuberculous meningitis and pericarditis patients (Strang  
330 et al., 2004; Thwaites et al., 2004; Wiysonge et al., 2017). However, many of these observed  
331 beneficial effects are either minor or under debate. This may be due to GC therapy benefiting only a  
332 subset of patients whose disease has mainly progressed as a result of an excessive inflammatory  
333 response (which can be controlled with GC therapy), rather than a failed reaction to the infection,  
334 which was demonstrated for GC-treated TB meningitis patients with specific polymorphisms in the  
335 *LTA4H* gene (Tobin et al., 2012). We therefore suggest that in a subset of patients at later stages of  
336 infection, the anti-inflammatory effects of a GC treatment may outweigh a possible inhibitory effect  
337 on the phagocytic activity of the macrophages. Further research using the zebrafish model may shed  
338 light on a possible interplay between these effects, since the *Mm* infection model has been shown to  
339 have excellent translational value for human TB, including the effects of GC treatment (Tobin 2010,  
340 Tobin 2012).

341 In conclusion, our *in vivo* study on the effect of GC treatment in the zebrafish *Mm* infection model  
342 shows that GCs, through activation of Gr, inhibit the phagocytic activity of macrophages, which  
343 results in more extracellular bacterial growth and a higher infection level. These results may explain  
344 why clinically prolonged GC treatment is associated with an increased risk of TB and other bacterial  
345 infections.

346

## 347 **Materials and methods**

### 348 **Zebrafish lines and maintenance**

349 Zebrafish were maintained and handled according to the guidelines from the Zebrafish Model  
350 Organism Database (<http://zfin.org>) and in compliance with the directives of the local animal welfare  
351 body of Leiden University. They were exposed to a 14 hours light and 10 hours dark cycle to maintain  
352 circadian rhythmicity. Fertilization was performed by natural spawning at the beginning of the light  
353 period. Eggs were collected and raised at 28°C in egg water (60 µg/ml Instant Ocean sea salts and  
354 0.0025% methylene blue). The following fish lines were used: wild type strain AB/TL, and the

355 transgenic lines *Tg(mpeg1:mCherry-F<sup>umsF001</sup>)* (Bernut et al., 2014) and *Tg(mpeg1:eGFP<sup>gl22</sup>)* (Ellett et al.,  
356 2011).

### 357 **Bacterial culture and infection through intravenous injections**

358 Bacteria used for this study were *Mycobacteria marinum*, strain M, constitutively fluorescently  
359 labelled with Wasabi or mCrimson (Ramakrishnan and Falkow, 1994; Takaki et al., 2013), *Mm* mutant  
360  $\Delta$ *erp* labelled with Wasabi (Cosma et al., 2006), and *Salmonella enterica serovar* Typhimurium (*S.*  
361 Typhimurium) wild type (wt) strain SL1344 labelled with mCherry (Burton et al., 2014; Hoiseth and  
362 Stocker, 1981). The *Mm* strain M and *S.* Typhimurium wt strain were cultured at 28°C and 37°C  
363 respectively and the bacterial suspensions were prepared with phosphate buffered saline (PBS) with  
364 2% (w/v) polyvinylpyrrolidone-40 (PVP40, Sigma-Aldrich), as previously described (Benard et al.,  
365 2012). The suspension of *Mm*  $\Delta$ *erp*-Wasabi was prepared directly from -80°C frozen aliquots.

366 After anesthesia with 0.02% aminobenzoic acid ethyl ester (tricaine, Sigma-Aldrich), 28 hours post  
367 fertilization (hpf) embryos were injected with *Mm* or *S.* Typhimurium into the blood island (or  
368 hindbrain if specified) under a Leica M165C stereomicroscope, as previously described (Benard et al.,  
369 2012). The injection dose was 200 CFU for *Mm* and 50 CFU for *S.* Typhimurium.

### 370 **Chemical treatments and bacterial burden quantification**

371 The embryos were treated with 25  $\mu$ M (or different if specified) beclomethasone (Sigma-Aldrich) or  
372 vehicle (0.05% dimethyl sulfoxide (DMSO)) in egg water from 2 hours before injection to the end of  
373 an experiment. RU-486 (Sigma-Aldrich) was administered at a concentration of 5  $\mu$ M (0.02% DMSO),  
374 and cycloheximide (Sigma-Aldrich) at 100  $\mu$ g/ml (0.04% DMSO). If the treatment lasted longer than 1  
375 day, the medium was refreshed every day.

376 For bacterial burden quantification, the embryos from the vehicle- and beclomethasone-treated  
377 groups were imaged alive using a Leica M205FA fluorescence stereomicroscope equipped with a  
378 Leica DFC 345FX camera (Leica Microsystems). The images were analyzed using custom-designed  
379 pixel quantification software (previously described by Benard et al. (2015)), and Image J (plugin  
380 'Analyze Particles').

### 381 **Hindbrain infection and analysis of dissemination**

382 To assess the dissemination efficiency, the embryos were injected with 50 CFU *Mm* into the  
383 hindbrain at 28 hpf. At 2 dpi, the embryos were imaged with a Leica M205FA fluorescence  
384 stereomicroscope equipped with a Leica DFC 345FX camera. The embryos were classified into two

385 categories: with or without disseminated infection. An embryo was considered without disseminated  
386 infection if all the bacteria were still contained in the hindbrain ventricle and considered with  
387 dissemination if bacteria were present in any other part of the embryo.

### 388 **Analysis of microbicidal activity**

389 After infection at 28 hpf with *Mm Δerp-Wasabi*, *Tg(mpeg1:mCherry-F)* embryos were fixed at 44 hpi  
390 with 4% paraformaldehyde (PFA, Sigma-Aldrich) and imaged using a Leica TCS SP8 confocal  
391 microscope with 40X objective (NA 1.3). All macrophages that contained *Mm Δerp-Wasabi* in the tail  
392 region were analyzed. The level of infection inside macrophages was classified into two categories  
393 based on the number of bacteria: 1-10 bacteria or >10 bacteria, following established protocols (Clay  
394 et al., 2008; Sommer et al., 2020).

### 395 **Analysis of phagocytic activity**

396 After infection at 28 hpf with *Mm-Wasabi* or *S. Typhimurium-mCherry*, *Tg(mpeg1:mCherry-F)* or  
397 *Tg(mpeg1:GFP)* embryos were fixed with 4% PFA at different time points and imaged using a Leica  
398 TCS SP8 confocal microscope with 20X objective (NA 0.75). The yolk sac area was selected as the  
399 quantification area (Figure 4A). The number of fluorescently labelled *Mm* or *S. Typhimurium* in this  
400 area, and those present inside a macrophage, were counted in a manual and blinded way.

### 401 **TUNEL assay**

402 After infection at 28 hpf, *Tg(mpeg1:mCherry-F)* embryos were fixed with 4% PFA at 48 hpi and  
403 stained using terminal deoxynucleotidyl transferase dUTP nick end labelling (TUNEL) with the In Situ  
404 Cell Death Detection Kit, TMR red (Sigma-Aldrich), as previously described by Zhang et al. (2019). For  
405 this TUNEL staining, the embryos were first dehydrated and then rehydrated gradually with  
406 methanol in PBS, and permeabilized with 10 µg/ml Proteinase K (Roche). The embryos were  
407 subsequently fixed with 4% PFA for another 20 min and stained with reagent mixture overnight at  
408 37°C. After the reaction was stopped by washing with PBS containing 0.05% Tween-20 (PBST), the  
409 CHT region of the embryos was imaged using a Leica TCS SP8 confocal microscope with 40X objective  
410 (NA 1.3). The total number of fluorescently labelled *Mm* clusters and the number of these clusters  
411 overlapping with TUNEL staining were counted in a manual and blinded way.

### 412 **Fluorescence-Activated Cell Sorting (FACS) of macrophages**

413 Macrophages were sorted from *Tg(mpeg1:mCherry-F)* embryos as previously described (Rougeot et  
414 al., 2014; Zakrzewska et al., 2010). Dissociation was performed with 150-200 embryos for each

415 sample after 2 hours beclomethasone or vehicle treatment (started at 28 hpf) using Liberase TL  
416 (Roche) and stopped by adding Fetal Calf Serum (FCS) to a final concentration of 10%. Isolated cells  
417 were resuspended in Dulbecco's PBS (DPBS), and filtered through a 40 µm cell strainer. Actinomycin  
418 D (Sigma-Aldrich) was added (final concentration of 1 µg/ml) to each step to inhibit transcription.  
419 Macrophages were sorted based on their red fluorescent signal using a FACS Aria III cell sorter (BD  
420 Biosciences). The sorted cells were collected in QIAzol lysis reagent (Qiagen) for RNA isolation.

#### 421 **RNA isolation, cDNA synthesis and quantitative PCR (qPCR) analysis**

422 RNA isolation from FACS-sorted cells was performed using the miRNeasy mini kit (Qiagen), according  
423 to the manufacturer's instructions. Extracted total RNA was reverse-transcribed using the iScript™  
424 cDNA Synthesis Kit (Bio-Rad). QPCR was performed on a MyiQ Single-Color Real-Time PCR Detection  
425 System (Bio-Rad) using iTaq™ Universal SYBR® Green Supermix (Bio-Rad). The sequences of the  
426 primers used are provided in Supplementary Table 1. Cycling conditions were pre-denaturation for 3  
427 min at 95°C, followed by 40 cycles of denaturation for 15 s at 95°C, annealing for 30 s at 60°C, and  
428 elongation for 30 s at 72°C. Fluorescent signals were measured at the end of each cycle. Cycle  
429 threshold values (Ct values, i.e. the cycle numbers at which a threshold value of the fluorescence  
430 intensity was reached) were determined for each sample. To determine the gene regulation due to  
431 beclomethasone treatment in each experiment, the average Ct value of the beclomethasone treated  
432 samples was subtracted from the average Ct value of the vehicle-treated samples, and the fold  
433 change of gene expression was calculated, which was subsequently adjusted to the expression levels  
434 of a reference gene (*peptidylprolyl isomerase Ab (ppiab)*).

#### 435 **Statistical analysis**

436 Statistical analysis was performed using GraphPad Prism by one-way ANOVA with Bonferroni's post  
437 hoc test (Figure 1A) or two-way ANOVA with Tukey's post hoc test (Figure 1B, Figure 2 A-C) or two-  
438 tailed t-test (Figure 2D, Figure 3, 5, 6) or using R Statistical Software by fitting data to a beta inflated  
439 regression (from 'gamlss' package) (Stasinopoulos and Rigby, 2007) with Tukey's post hoc test (Figure  
440 4, 7).

441

#### 442 **Acknowledgements**

443 We thank Frida Sommer for her advice on *Mm Δerp* assays, Ralf Boland, Salomé Munoz Sanchez, Dr.  
444 Michiel van der Vaart and Aleksandra Fesliyska for their assistance with bacterial infections, Dr. Rui  
445 Zhang and Dr. Monica Varela Alvarez for their suggestions concerning TUNEL assays and Patrick van

446 Hage for his help with the statistical analysis. We thank the fish facility team, in particular Ulrike  
447 Nehrdich, Ruth van Koppen, Karen Bosma and Guus van der Velden for zebrafish maintenance. We  
448 thank Dr. Georges Lutfalla and Dr. Graham Lieschke for providing transgenic zebrafish lines.

449

#### 450 **Competing interests**

451 No competing interests declared.

452

#### 453 **Funding**

454 Yufei Xie was funded by a grant from the China Scholarship Council (CSC).



## 455 References

- 456 **Alsop, D. and Vijayan, M. M.** (2008). Development of the corticosteroid stress axis and  
457 receptor expression in zebrafish. *Am J Physiol Regul Integr Comp Physiol* **294**, R711-9.
- 458 **Alzeer, A. H. and FitzGerald, J. M.** (1993). Corticosteroids and tuberculosis: risks and use as  
459 adjunct therapy. *Tuber Lung Dis* **74**, 6-11.
- 460 **Banerjee, H., Krauss, C., Worthington, M., Banerjee, N., Walker, R. S., Hodges, S., Chen, L.,  
461 Rawat, K., Dasgupta, S., Ghosh, S. et al.** (2019). Differential expression of efferocytosis and  
462 phagocytosis associated genes in tumor associated macrophages exposed to African American  
463 patient derived prostate cancer microenvironment. *J Solid Tumors* **9**, 22-27.
- 464 **Benard, E. L., Roobol, S. J., Spaink, H. P. and Meijer, A. H.** (2014). Phagocytosis of  
465 mycobacteria by zebrafish macrophages is dependent on the scavenger receptor Marco, a key  
466 control factor of pro-inflammatory signalling. *Dev Comp Immunol* **47**, 223-33.
- 467 **Benard, E. L., van der Sar, A. M., Ellett, F., Lieschke, G. J., Spaink, H. P. and Meijer, A. H.**  
468 (2012). Infection of zebrafish embryos with intracellular bacterial pathogens. *J Vis Exp*.
- 469 **Bernut, A., Herrmann, J.-L., Kissa, K., Dubremetz, J.-F., Gaillard, J.-L., Lutfalla, G. and Kremer,  
470 L.** (2014). Mycobacterium abscessus cording prevents phagocytosis and promotes abscess formation.  
471 *Proceedings of the National Academy of Sciences* **111**, E943-E952.
- 472 **Bovornkitti, S., Kangsadal, P., Sathirapat, P. and Oonsombatti, P.** (1960). Reversion and  
473 Reconversion Rate of Tuberculin Skin Reactions in Correlation with the Use of  
474 Prednisone<sup>1</sup>. *Diseases of the Chest* **38**, 51-55.
- 475 **Buckley, L. and Humphrey, M. B.** (2018). Glucocorticoid-Induced Osteoporosis. *N Engl J Med*  
476 **379**, 2547-2556.
- 477 **Burton, N. A., Schürmann, N., Casse, O., Steeb, A. K., Claudi, B., Zankl, J., Schmidt, A. and  
478 Bumann, D.** (2014). Disparate impact of oxidative host defenses determines the fate of Salmonella  
479 during systemic infection in mice. *Cell Host & Microbe* **15**, 72-83.
- 480 **Busillo, J. M. and Cidlowski, J. A.** (2013). The five Rs of glucocorticoid action during  
481 inflammation: ready, reinforce, repress, resolve, and restore. *Trends Endocrinol Metab* **24**, 109-19.
- 482 **Cambier, C. J., Falkow, S. and Ramakrishnan, L.** (2014). Host evasion and exploitation  
483 schemes of Mycobacterium tuberculosis. *Cell* **159**, 1497-509.
- 484 **Caplan, A., Fett, N., Rosenbach, M., Werth, V. P. and Micheletti, R. G.** (2017). Prevention  
485 and management of glucocorticoid-induced side effects: A comprehensive review: A review of  
486 glucocorticoid pharmacology and bone health. *J Am Acad Dermatol* **76**, 1-9.

- 487 **Carballo, E., Pitterle, D. M., Stumpo, D. J., Sperling, R. T. and Blackshear, P. J. (1999).**  
488 Phagocytic and macropinocytic activity in MARCKS-deficient macrophages and fibroblasts. *American*  
489 *Journal of Physiology-Cell Physiology* **277**, C163-C173.
- 490 **Chatzopoulou, A., Heijmans, J. P., Burgerhout, E., Oskam, N., Spaink, H. P., Meijer, A. H. and**  
491 **Schaaf, M. J. (2016).** Glucocorticoid-induced attenuation of the inflammatory response in zebrafish.  
492 *Endocrinology* **157**, 2772-2784.
- 493 **Chatzopoulou, A., Roy, U., Meijer, A. H., Alia, A., Spaink, H. P. and Schaaf, M. J. (2015).**  
494 Transcriptional and metabolic effects of glucocorticoid receptor  $\alpha$  and  $\beta$  signaling in zebrafish.  
495 *Endocrinology* **156**, 1757-1769.
- 496 **Clay, H., Davis, J. M., Beery, D., Huttenlocher, A., Lyons, S. E. and Ramakrishnan, L. (2007).**  
497 Dichotomous role of the macrophage in early *Mycobacterium marinum* infection of the zebrafish.  
498 *Cell Host Microbe* **2**, 29-39.
- 499 **Clay, H., Volkman, H. E. and Ramakrishnan, L. (2008).** Tumor necrosis factor signaling  
500 mediates resistance to mycobacteria by inhibiting bacterial growth and macrophage death. *Immunity*  
501 **29**, 283-94.
- 502 **Cosma, C. L., Klein, K., Kim, R., Beery, D. and Ramakrishnan, L. (2006).** *Mycobacterium*  
503 *marinum* Erp is a virulence determinant required for cell wall integrity and intracellular survival.  
504 *Infection and immunity* **74**, 3125-3133.
- 505 **Critchley, J. A., Orton, L. C. and Pearson, F. (2014).** Adjunctive steroid therapy for managing  
506 pulmonary tuberculosis. *Cochrane Database Syst Rev*, Cd011370.
- 507 **Cronan, M. R. and Tobin, D. M. (2014).** Fit for consumption: zebrafish as a model for  
508 tuberculosis. *Disease models & mechanisms* **7**, 777-784.
- 509 **Davis, J. M., Clay, H., Lewis, J. L., Ghori, N., Herbomel, P. and Ramakrishnan, L. (2002).** Real-  
510 Time Visualization of *Mycobacterium*-Macrophage Interactions Leading to Initiation of Granuloma  
511 Formation in Zebrafish Embryos. *Immunity* **17**, 693-702.
- 512 **Davis, J. M. and Ramakrishnan, L. (2009).** The Role of the Granuloma in Expansion and  
513 Dissemination of Early Tuberculous Infection. *Cell* **136**, 37-49.
- 514 **Dixon, W., Kezouh, A., Bernatsky, S. and Suissa, S. (2011).** The influence of systemic  
515 glucocorticoid therapy upon the risk of non-serious infection in older patients with rheumatoid  
516 arthritis: a nested case-control study. *Annals of the rheumatic diseases* **70**, 956-960.
- 517 **Drain, P. K., Bajema, K. L., Dowdy, D., Dheda, K., Naidoo, K., Schumacher, S. G., Ma, S.,**  
518 **Meermeier, E., Lewinsohn, D. M. and Sherman, D. R. (2018).** Incipient and Subclinical Tuberculosis: a  
519 Clinical Review of Early Stages and Progression of Infection. *Clin Microbiol Rev* **31**.
- 520 **Ehrchen, J. M., Roth, J. and Barczyk-Kahlert, K. (2019).** More Than Suppression:  
521 Glucocorticoid Action on Monocytes and Macrophages. *Front Immunol* **10**, 2028.

522 **Ellett, F., Pase, L., Hayman, J. W., Andrianopoulos, A. and Lieschke, G. J.** (2011). mpeg1  
523 promoter transgenes direct macrophage-lineage expression in zebrafish. *Blood* **117**, e49-e56.

524 **Evans, D. J.** (2008). The use of adjunctive corticosteroids in the treatment of pericardial,  
525 pleural and meningeal tuberculosis: Do they improve outcome? *Respiratory Medicine* **102**, 793-800.

526 **Facchinello, N., Skobo, T., Meneghetti, G., Colletti, E., Dinarello, A., Tiso, N., Costa, R.,**  
527 **Gioacchini, G., Carnevali, O. and Argenton, F.** (2017). nr3c1 null mutant zebrafish are viable and  
528 reveal DNA-binding-independent activities of the glucocorticoid receptor. *Scientific reports* **7**, 1-13.

529 **Fardet, L., Petersen, I. and Nazareth, I.** (2016). Common Infections in Patients Prescribed  
530 Systemic Glucocorticoids in Primary Care: A Population-Based Cohort Study. *PLoS Med* **13**, e1002024.

531 **Faught, E. and Vijayan, M. M.** (2019). Loss of the glucocorticoid receptor in zebrafish  
532 improves muscle glucose availability and increases growth. *Am J Physiol Endocrinol Metab* **316**,  
533 E1093-e1104.

534 **Furin, J., Cox, H. and Pai, M.** (2019). Tuberculosis. *The Lancet* **393**, 1642-1656.

535 **Gräb, J., Suárez, I., van Gumpel, E., Winter, S., Schreiber, F., Esser, A., Hölscher, C., Fritsch,**  
536 **M., Herb, M. and Schramm, M.** (2019). Corticosteroids inhibit Mycobacterium tuberculosis-induced  
537 necrotic host cell death by abrogating mitochondrial membrane permeability transition. *Nature*  
538 *communications* **10**, 1-14.

539 **Hawn, T. R., Matheson, A. I., Maley, S. N. and Vandal, O.** (2013). Host-directed therapeutics  
540 for tuberculosis: can we harness the host? *Microbiol. Mol. Biol. Rev.* **77**, 608-627.

541 **Hoiseh, S. K. and Stocker, B.** (1981). Aromatic-dependent Salmonella typhimurium are non-  
542 virulent and effective as live vaccines. *Nature* **291**, 238-239.

543 **Houben, R. M. and Dodd, P. J.** (2016). The global burden of latent tuberculosis infection: a  
544 re-estimation using mathematical modelling. *PLoS Med* **13**, e1002152.

545 **Jeon, H., Go, Y., Seo, M., Lee, W. H. and Suk, K.** (2010). Functional selection of phagocytosis-  
546 promoting genes: cell sorting-based selection. *J Biomol Screen* **15**, 949-55.

547 **Jessop, J., Vernon-Roberts, B. and Harris, J.** (1973). Effects of gold salts and prednisolone on  
548 inflammatory cells. I. Phagocytic activity of macrophages and polymorphs in inflammatory exudates  
549 studied by a "skin-window" technique in rheumatoid and control patients. *Annals of the rheumatic*  
550 *diseases* **32**, 294.

551 **Jick, S. S., Lieberman, E. S., Rahman, M. U. and Choi, H. K.** (2006). Glucocorticoid use, other  
552 associated factors, and the risk of tuberculosis. *Arthritis Rheum* **55**, 19-26.

553 **Kadhiravan, T. and Deepanjali, S.** (2010). Role of corticosteroids in the treatment of  
554 tuberculosis: an evidence-based update. *Indian J Chest Dis Allied Sci* **52**, 153-8.

- 555 **Kim, H., Yoo, C., Baek, H., Lee, E. B., Ahn, C., Han, J., Kim, S., Lee, J.-S., Choe, K. and Song, Y.-**  
556 **W.** (1998). Mycobacterium tuberculosis infection in a corticosteroid-treated rheumatic disease  
557 patient population. *Clinical and experimental rheumatology* **16**, 9-13.
- 558 **Kulchavenya, E.** (2014). Extrapulmonary tuberculosis: are statistical reports accurate?  
559 *Therapeutic Advances in Infectious Disease* **2**, 61-70.
- 560 **Lerner, B. H.** (1996). Can stress cause disease? Revisiting the tuberculosis research of Thomas  
561 Holmes, 1949-1961. *Ann Intern Med* **124**, 673-80.
- 562 **Lesley, R. and Ramakrishnan, L.** (2008). Insights into early mycobacterial pathogenesis from  
563 the zebrafish. *Curr Opin Microbiol* **11**, 277-83.
- 564 **Lewis, K. N., Liao, R., Guinn, K. M., Hickey, M. J., Smith, S., Behr, M. A. and Sherman, D. R.**  
565 (2003). Deletion of RD1 from Mycobacterium tuberculosis mimics bacille Calmette-Guerin  
566 attenuation. *J Infect Dis* **187**, 117-23.
- 567 **Lin, P. L. and Flynn, J. L.** (2010). Understanding latent tuberculosis: a moving target. *The*  
568 *Journal of Immunology* **185**, 15-22.
- 569 **Liu, Y., Cousin, J. M., Hughes, J., Van Damme, J., Seckl, J. R., Haslett, C., Dransfield, I., Savill,**  
570 **J. and Rossi, A. G.** (1999). Glucocorticoids Promote Nonphlogistic Phagocytosis of Apoptotic  
571 Leukocytes. *The Journal of Immunology* **162**, 3639-3646.
- 572 **Martinez, F. O. and Gordon, S.** (2014). The M1 and M2 paradigm of macrophage activation:  
573 time for reassessment. *F1000Prime Rep* **6**, 13.
- 574 **McColl, A., Bournazos, S., Franz, S., Perretti, M., Morgan, B. P., Haslett, C. and Dransfield, I.**  
575 (2009). Glucocorticoids induce protein S-dependent phagocytosis of apoptotic neutrophils by human  
576 macrophages. *J Immunol* **183**, 2167-75.
- 577 **McCubbrey, A. L., Sonstein, J., Ames, T. M., Freeman, C. M. and Curtis, J. L.** (2012).  
578 Glucocorticoids relieve collectin-driven suppression of apoptotic cell uptake in murine alveolar  
579 macrophages through downregulation of SIRP $\alpha$ . *The Journal of Immunology* **189**, 112-119.
- 580 **Meijer, A. H.** (2016). Protection and pathology in TB: learning from the zebrafish model.  
581 *Semin Immunopathol* **38**, 261-73.
- 582 **Muthuswamy, P., Hu, T.-C., Carasso, B., Antonio, M. and Dandamudi, N.** (1995). Prednisone  
583 as adjunctive therapy in the management of pulmonary tuberculosis: report of 12 cases and review  
584 of the literature. *CHEST* **107**, 1621-1630.
- 585 **Nguyen-Chi, M., Laplace-Builhe, B., Travnickova, J., Luz-Crawford, P., Tejedor, G., Phan, Q.**  
586 **T., Duroux-Richard, I., Levraud, J. P., Kissa, K., Lutfalla, G. et al.** (2015). Identification of polarized  
587 macrophage subsets in zebrafish. *Elife* **4**, e07288.
- 588 **Olivares-Morales, M. J., De La Fuente, M. K., Dubois-Camacho, K., Parada, D., Diaz-Jiménez,**  
589 **D., Torres-Riquelme, A., Xu, X., Chamorro-Veloso, N., Naves, R., Gonzalez, M.-J. et al.** (2018).

590 Glucocorticoids Impair Phagocytosis and Inflammatory Response Against Crohn's Disease-Associated  
591 Adherent-Invasive Escherichia coli. *Frontiers in Immunology* **9**.

592 **Parikka, M., Hammaren, M. M., Harjula, S. K., Halfpenny, N. J., Oksanen, K. E., Lahtinen, M.**  
593 **J., Pajula, E. T., Iivanainen, A., Pesu, M. and Ramet, M.** (2012). Mycobacterium marinum causes a  
594 latent infection that can be reactivated by gamma irradiation in adult zebrafish. *PLoS Pathog* **8**,  
595 e1002944.

596 **Prasad, K., Singh, M. B. and Ryan, H.** (2016). Corticosteroids for managing tuberculous  
597 meningitis. *Cochrane Database of Systematic Reviews*.

598 **Ramakrishnan, L.** (2013). The zebrafish guide to tuberculosis immunity and treatment. *Cold*  
599 *Spring Harb Symp Quant Biol* **78**, 179-92.

600 **Ramakrishnan, L. and Falkow, S.** (1994). Mycobacterium marinum persists in cultured  
601 mammalian cells in a temperature-restricted fashion. *Infection and immunity* **62**, 3222-3229.

602 **Rougeot, J., Zakrzewska, A., Kanwal, Z., Jansen, H. J., Spaink, H. P. and Meijer, A. H.** (2014).  
603 RNA sequencing of FACS-sorted immune cell populations from zebrafish infection models to identify  
604 cell specific responses to intracellular pathogens. *Methods Mol Biol* **1197**, 261-74.

605 **Russell, D. G.** (2011). Mycobacterium tuberculosis and the intimate discourse of a chronic  
606 infection. *Immunological reviews* **240**, 252-268.

607 **Ryan, H., Yoo, J. and Darsini, P.** (2017). Corticosteroids for tuberculous pleurisy. *Cochrane*  
608 *Database of Systematic Reviews*.

609 **Schaaf, M., Chatzopoulou, A. and Spaink, H.** (2009). The zebrafish as a model system for  
610 glucocorticoid receptor research. *Comparative Biochemistry and Physiology Part A: Molecular &*  
611 *Integrative Physiology* **153**, 75-82.

612 **Schatz, M., Patterson, R., Kloner, R. and Falk, J.** (1976). The prevalence of tuberculosis and  
613 positive tuberculin skin tests in a steroid-treated asthmatic population. *Ann Intern Med* **84**, 261-5.

614 **Singh, S. and Tiwari, K.** (2017). Use of corticosteroids in tuberculosis. *The Journal of*  
615 *Association of Chest Physicians* **5**, 70-75.

616 **Smego, R. A. and Ahmed, N.** (2003). A systematic review of the adjunctive use of systemic  
617 corticosteroids for pulmonary tuberculosis. *Int J Tuberc Lung Dis* **7**, 208-13.

618 **Sommer, F., Torraca, V., Kamel, S. M., Lombardi, A. and Meijer, A. H.** (2020). Frontline  
619 Science: Antagonism between regular and atypical Cxcr3 receptors regulates macrophage migration  
620 during infection and injury in zebrafish. *Journal of leukocyte biology* **107**, 185-203.

621 **Srivastava, S., Ernst, J. D. and Desvignes, L.** (2014). Beyond macrophages: the diversity of  
622 mononuclear cells in tuberculosis. *Immunol Rev* **262**, 179-92.

623 **Stasinopoulos, D. M. and Rigby, R. A.** (2007). Generalized additive models for location scale  
624 and shape (GAMLSS) in R. *Journal of Statistical Software* **23**, 1-46.

625 **Stolte, E. H., van Kemenade, B. L. V., Savelkoul, H. F. and Flik, G.** (2006). Evolution of  
626 glucocorticoid receptors with different glucocorticoid sensitivity. *Journal of Endocrinology* **190**, 17-28.

627 **Strang, J. I., Nunn, A. J., Johnson, D. A., Casbard, A., Gibson, D. G. and Girling, D. J.** (2004).  
628 Management of tuberculous constrictive pericarditis and tuberculous pericardial effusion in Transkei:  
629 results at 10 years follow-up. *Qjm* **97**, 525-35.

630 **Suh, S. and Park, M. K.** (2017). Glucocorticoid-Induced Diabetes Mellitus: An Important but  
631 Overlooked Problem. *Endocrinol Metab (Seoul)* **32**, 180-189.

632 **Takaki, K., Davis, J. M., Winglee, K. and Ramakrishnan, L.** (2013). Evaluation of the  
633 pathogenesis and treatment of Mycobacterium marinum infection in zebrafish. *Nature protocols* **8**,  
634 1114.

635 **Taylor, A., Finney-Hayward, T., Quint, J., Thomas, C., Tudhope, S., Wedzicha, J., Barnes, P.**  
636 **and Donnelly, L.** (2010). Defective macrophage phagocytosis of bacteria in COPD. *European*  
637 *Respiratory Journal* **35**, 1039-1047.

638 **Thwaites, G. E., Nguyen, D. B., Nguyen, H. D., Hoang, T. Q., Do, T. T., Nguyen, T. C., Nguyen,**  
639 **Q. H., Nguyen, T. T., Nguyen, N. H., Nguyen, T. N. et al.** (2004). Dexamethasone for the treatment of  
640 tuberculous meningitis in adolescents and adults. *N Engl J Med* **351**, 1741-51.

641 **Tobin, D. M. and Ramakrishnan, L.** (2008). Comparative pathogenesis of Mycobacterium  
642 marinum and Mycobacterium tuberculosis. *Cellular microbiology* **10**, 1027-1039.

643 **Tobin, D. M., Roca, F. J., Oh, S. F., McFarland, R., Vickery, T. W., Ray, J. P., Ko, D. C., Zou, Y.,**  
644 **Bang, N. D. and Chau, T. T.** (2012). Host genotype-specific therapies can optimize the inflammatory  
645 response to mycobacterial infections. *Cell* **148**, 434-446.

646 **Tobin, D. M., Vary Jr, J. C., Ray, J. P., Walsh, G. S., Dunstan, S. J., Bang, N. D., Hagge, D. A.,**  
647 **Khadge, S., King, M.-C. and Hawn, T. R.** (2010). The It4h locus modulates susceptibility to  
648 mycobacterial infection in zebrafish and humans. *Cell* **140**, 717-730.

649 **Torok, M. E., Nguyen, D. B., Tran, T. H., Nguyen, T. B., Thwaites, G. E., Hoang, T. Q., Nguyen,**  
650 **H. D., Tran, T. H., Nguyen, T. C., Hoang, H. T. et al.** (2011). Dexamethasone and long-term outcome  
651 of tuberculous meningitis in Vietnamese adults and adolescents. *PLoS One* **6**, e27821.

652 **van der Goes, A., Hoekstra, K., van den Berg, T. K. and Dijkstra, C. D.** (2000).  
653 Dexamethasone promotes phagocytosis and bacterial killing by human monocytes/macrophages in  
654 vitro. *Journal of leukocyte biology* **67**, 801-807.

655 **van Leeuwen, L. M., van der Sar, A. M. and Bitter, W.** (2015). Animal models of tuberculosis:  
656 zebrafish. *Cold Spring Harbor perspectives in medicine* **5**, a018580.

657 **Vernon-Roberts, B., Jessop, J. and Dore, J.** (1973). Effects of gold salts and prednisolone on  
658 inflammatory cells. II. Suppression of inflammation and phagocytosis in the rat. *Annals of the*  
659 *rheumatic diseases* **32**, 301.

660           **Wiysonge, C. S., Ntsekhe, M., Thabane, L., Volmink, J., Majombozi, D., Gumedze, F., Pandie,**  
661 **S. and Mayosi, B. M.** (2017). Interventions for treating tuberculous pericarditis. *Cochrane Database*  
662 *Syst Rev* **9**, Cd000526.

663           **World Health Organization.** (2019). Global tuberculosis report 2019. Geneva: World Health  
664 Organization.

665           **Xie, Y., Tolmeijer, S., Oskam, J. M., Tonkens, T., Meijer, A. H. and Schaaf, M. J.** (2019).  
666 Glucocorticoids inhibit macrophage differentiation towards a pro-inflammatory phenotype upon  
667 wounding without affecting their migration. *Disease models & mechanisms* **12**, dmm037887.

668           **Zahuczky, G., Kristóf, E., Majai, G. and Fésüs, L.** (2011). Differentiation and Glucocorticoid  
669 Regulated Apopto-Phagocytic Gene Expression Patterns in Human Macrophages. Role of Mertk in  
670 Enhanced Phagocytosis. *PLoS One* **6**, e21349.

671           **Zakrzewska, A., Cui, C., Stockhammer, O. W., Benard, E. L., Spaink, H. P. and Meijer, A. H.**  
672 (2010). Macrophage-specific gene functions in Spi1-directed innate immunity. *Blood* **116**, e1-11.

673           **Zhang, R., Varela, M., Forn-Cuni, G., Torraca, V., van der Vaart, M. and Meijer, A. H.** (2019).  
674 Deficiency in the autophagy modulator Dram1 exacerbates pyroptotic cell death of Mycobacteria-  
675 infected macrophages. *bioRxiv*, 599266.

676

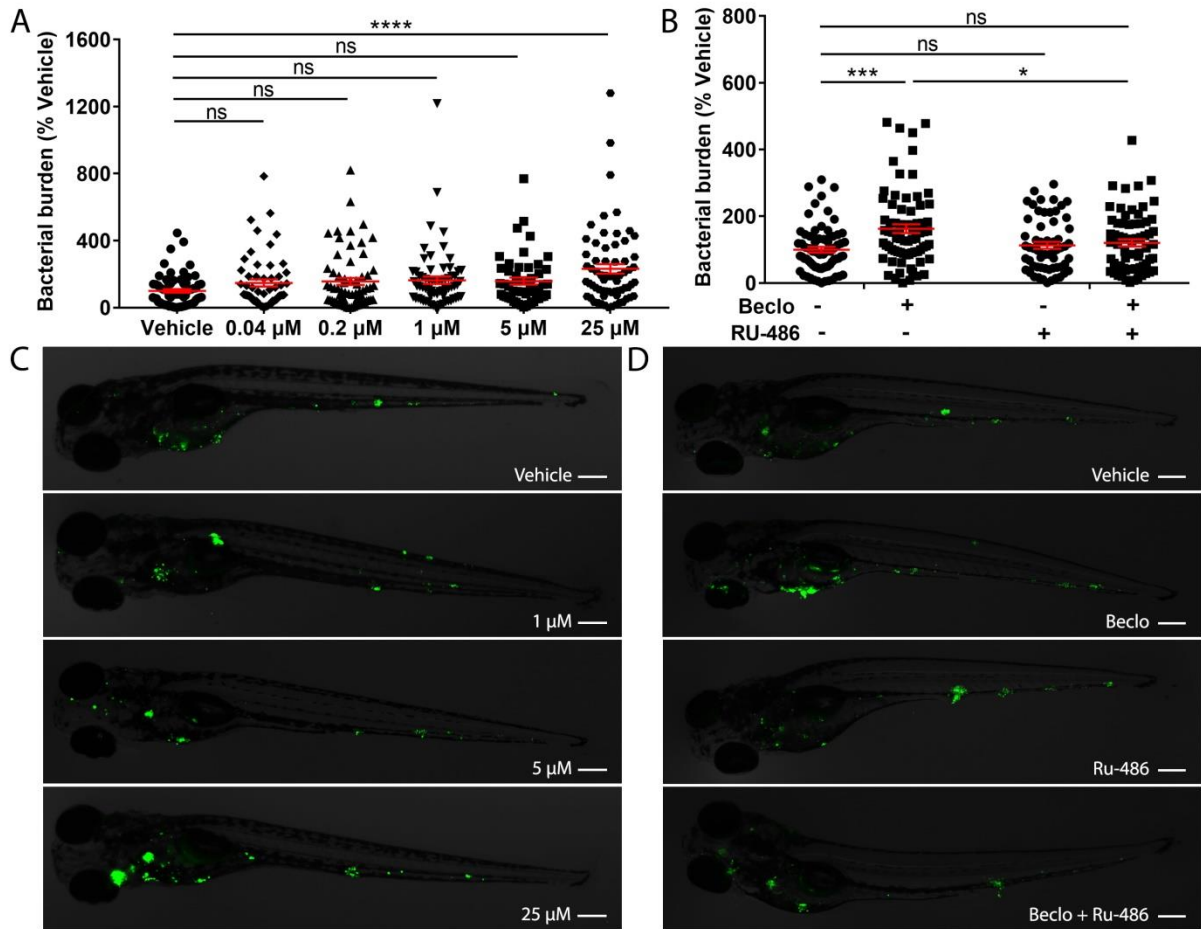

677

678 **Figure 1. Effect of beclomethasone on *Mm* infection burden in zebrafish.** A. Bacterial burden of  
679 zebrafish larvae at four days after intravenous injection (at 28 hpf) of *Mm* and treatment with vehicle  
680 or different concentrations of beclomethasone (beclo), started at 2 h before infection. Statistical  
681 analysis by one-way ANOVA with Bonferroni's post hoc test revealed that the bacterial burden was  
682 significantly increased in the group treated with 25 μM beclomethasone, compared to the burden of  
683 the vehicle-treated group. B. Effect of the GR antagonist RU-486 on the beclomethasone-induced  
684 increase of the bacterial burden at 4 dpi. The bacterial burden was significantly increased by  
685 beclomethasone (25 μM) treatment and this increase was abolished in the presence of RU-486.  
686 Statistical analysis was performed by two-way ANOVA with Tukey's post hoc test. In panels A and B,  
687 each data point represents a single larva and the means ± s.e.m. of data accumulated from three  
688 independent experiments are shown in red. Statistical significance is indicated by: ns, non-significant;  
689 \* P<0.05; \*\*\* P<0.001; \*\*\*\* P<0.0001. C-D. Representative fluorescence microscopy images of *Mm*-  
690 infected larvae at 4 days post infection (dpi), representing experimental groups presented in panels A  
691 and B. Bacteria are shown in green. Scale bar = 200 μm.



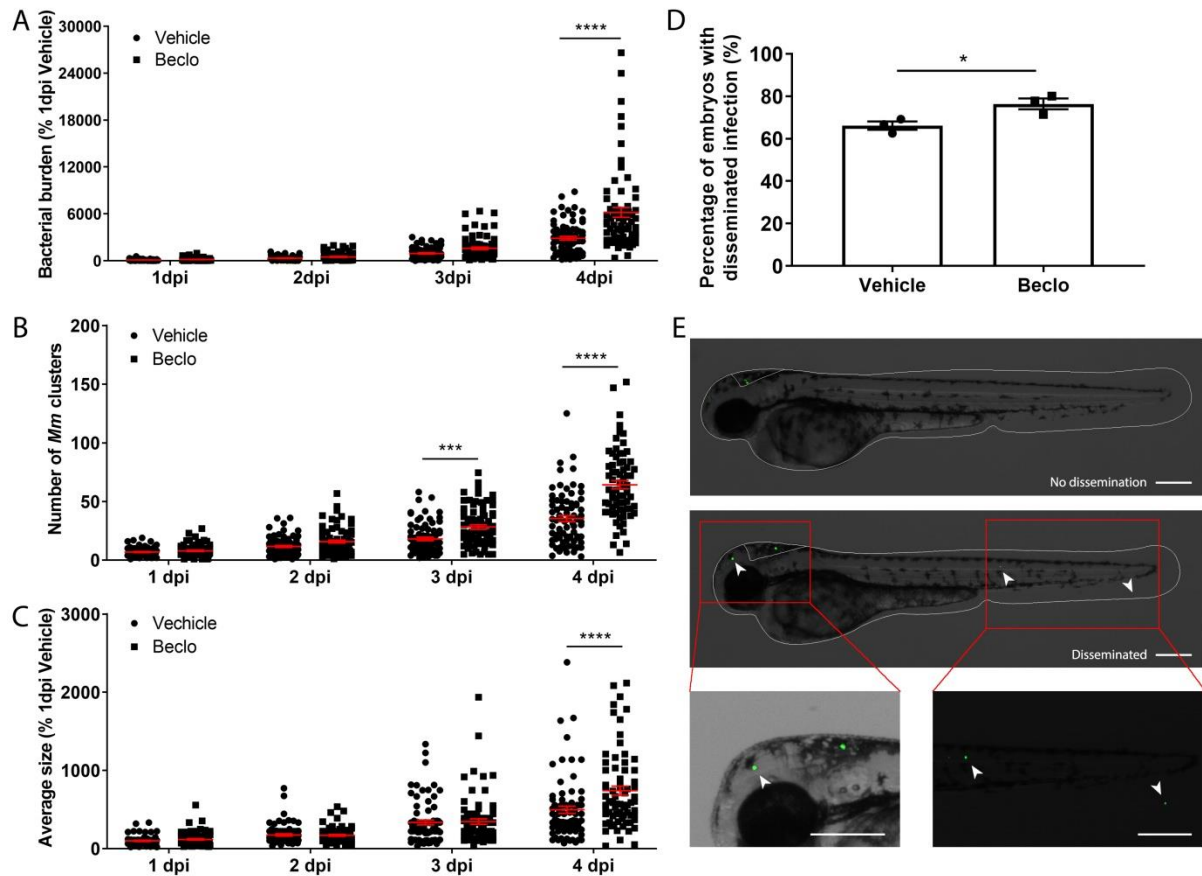

692

693 **Figure 2. Beclomethasone effects on *Mm* infection progression and bacterial dissemination.** A-C.

694 Bacterial burden (A), number of bacterial clusters (B) and the average size of bacterial clusters (C)

695 were determined at 1, 2, 3 and 4 dpi following intravenous *Mm* injection (28 hpf) and treatment with

696 vehicle or 25 μM beclomethasone, started at 2 h before infection. Significant increases due to the

697 beclomethasone treatment were observed for all parameters at 4 dpi. For the number of bacterial

698 clusters, the increase was also significant at 3 dpi. Statistical analysis was performed by two-way

699 ANOVA with Tukey's post hoc test. Each data point represents a single larva and the means ± s.e.m.

700 of data accumulated from three independent experiments are shown in red. Statistical significance is

701 indicated by: \*\*\* P<0.001; \*\*\*\* P<0.0001. D. Effect of beclomethasone on dissemination of *Mm* by

702 hindbrain ventricle injection. Hindbrain infections were performed at 28 hpf, and at 24 hours post

703 infection (hpi), a significantly increased percentage of larvae with disseminated *Mm* infection was

704 detected in the beclomethasone-treated group compared to the vehicle group. Statistical analysis

705 was performed by two-tailed t-test. Values shown are the means ± s.e.m. of three independent

706 experiments with a total sample size of 27 in the vehicle-treated group and 31 in the

707 beclomethasone-treated group. Statistical significance is indicated by: \* P<0.05. E. Representative

708 images of embryos with and without dissemination of the infection upon hindbrain injection of *Mm*.

709 Scale bar = 200 μm.

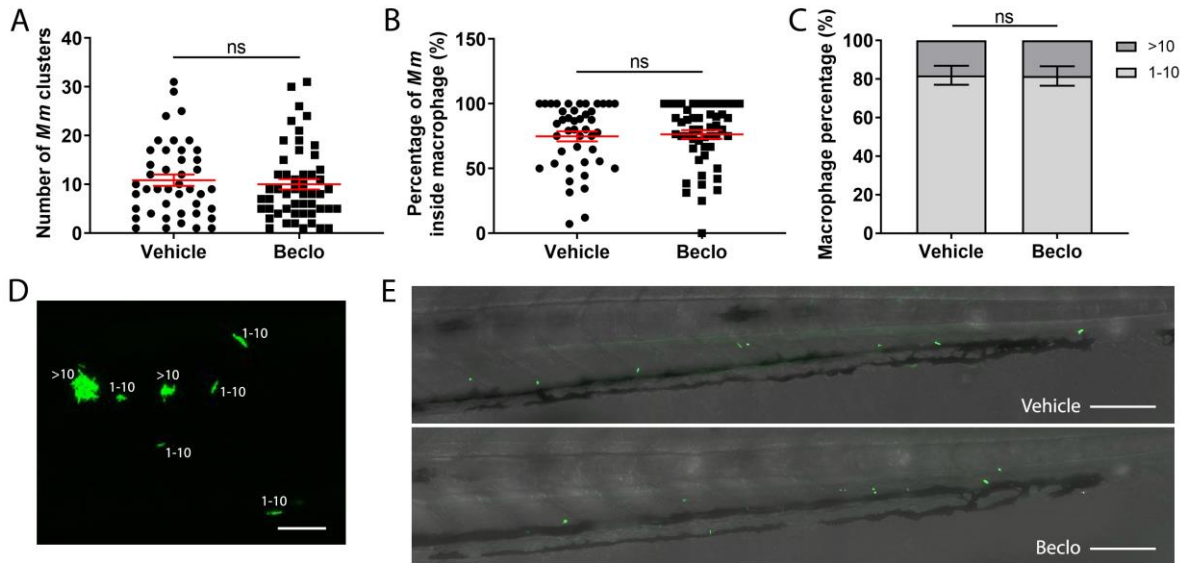

710

711 **Figure 3. Effect of beclomethasone on *Mm*  $\Delta$ *erp* mutant bacterial growth.** A-C. The *Mm*  $\Delta$ *erp*  
712 mutant strain was injected intravenously at 28 hpf, and at 44 hpi the number of *Mm* clusters (A) and  
713 the percentage of *Mm* inside macrophages (B), and the percentage of macrophages that contained 1-  
714 10 or more than 10 bacteria (of all macrophages containing bacteria) (C) were determined. No  
715 significant difference was observed between the vehicle- and beclomethasone-treated groups.  
716 Statistical analysis was performed using two-tailed t-tests. Values shown are the means  $\pm$  s.e.m. of  
717 three independent experiments, with each data point representing a single embryo. Statistical  
718 significance is indicated by: ns, non-significant. D. Representative confocal microscopy image of *Mm*  
719  $\Delta$ *erp* bacterial clusters (bacteria in green), indicated are clusters containing 1-10 bacteria and clusters  
720 containing more than 10 bacteria. Scale bar = 20  $\mu$ m. E. Representative images of the tail regions of a  
721 vehicle- and a beclomethasone-treated embryo infected with *Mm*  $\Delta$ *erp* bacteria. Scale bar = 100  $\mu$ m.

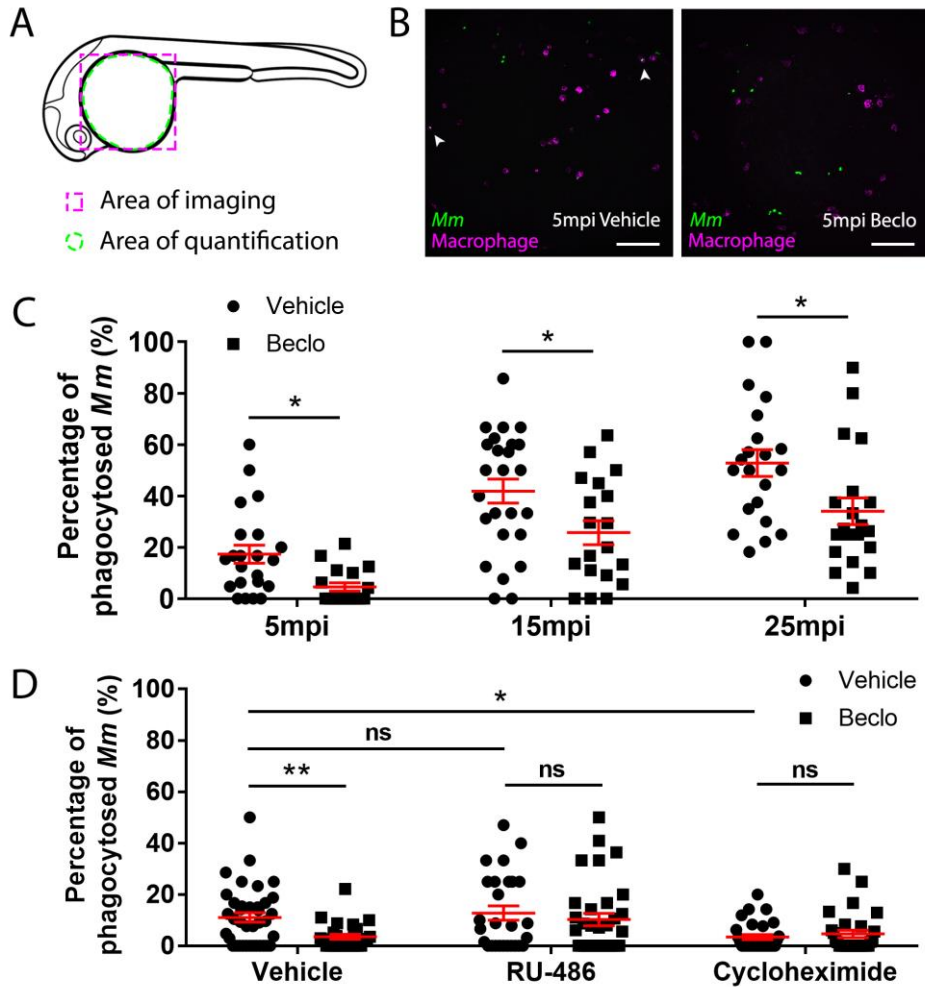

722

723 **Figure 4. Effect of beclomethasone on phagocytic activity of macrophages and its dependency on**

724 **Gr and *de novo* protein synthesis.** A. Schematic drawing of a zebrafish embryos at 28 hpf indicating

725 the areas of imaging (purple dashed box, used for representative images) and quantification (green

726 dashed circle) of *Mm* phagocytosis. B. Representative confocal microscopy images of embryos of the

727 *Tg(mpeg1:GFP)* line injected with *Mm* at 28 hpf. Images were taken of infected embryos that were

728 vehicle- or beclomethasone-treated at 5 minutes post infection (mpi). Macrophages are shown in

729 magenta, bacteria in green. Scale bar = 100  $\mu$ m. Arrowheads indicate bacterial clusters phagocytosed

730 by macrophages. C. Percentages of phagocytosed *Mm* clusters (of total number of *Mm* clusters) at 5,

731 15 and 25 mpi. Statistical analysis, performed by fitting data to a beta inflated regression with

732 Tukey's post hoc test, showed that beclomethasone decreased this percentage at all three time

733 points. D. Effects of RU-486 and cycloheximide on the beclomethasone-inhibited phagocytic activity.

734 Embryos were treated with vehicle or beclomethasone and received either a vehicle, RU-486 or

735 cycloheximide co-treatment two hours before injection of *Mm* at 28 hpf, and phagocytic activity was

736 determined at 5 mpi. The significant inhibitory effect of beclomethasone on phagocytosis was not

737 observed in the presence of RU-486. Cycloheximide, just like beclomethasone, significantly inhibited

738 the phagocytic activity, and the combined cycloheximide /beclomethasone treatment showed the  
739 same level of inhibition. Statistical analysis was performed by fitting data to a beta inflated  
740 regression with Tukey's post hoc test. In panels C and D, each data point represents a single embryo  
741 and the means  $\pm$  s.e.m. of data accumulated from three independent experiments are shown in red.  
742 Statistical significance is indicated by: ns, non-significant; \*  $P < 0.05$ ; \*\*  $P < 0.01$ .

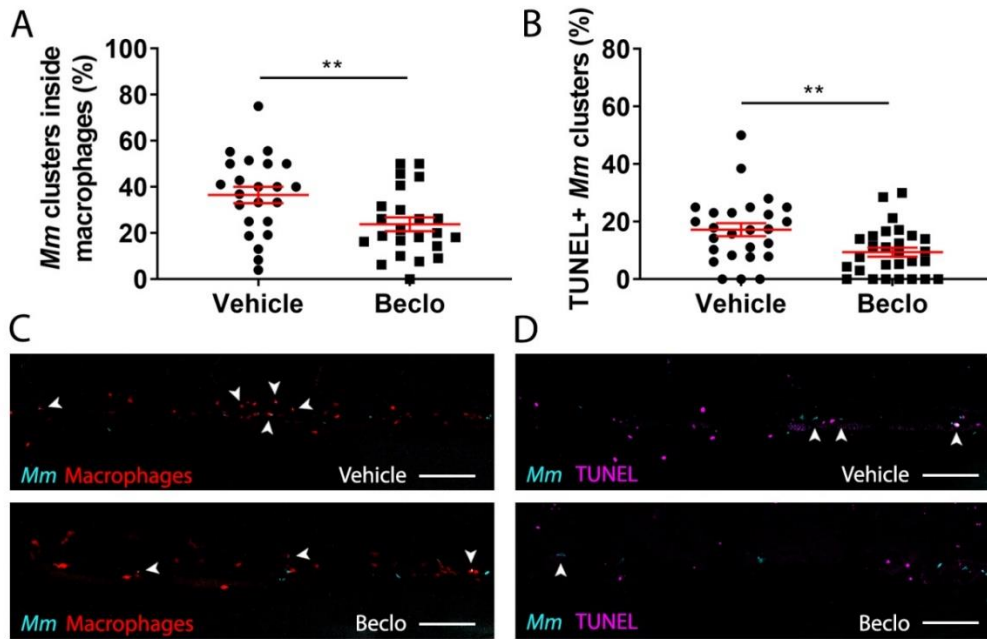

743

744 **Figure 5. Effect of beclomethasone on intracellular bacterial growth and cell death.** Infection was  
745 performed in *Tg(mpeg1:mCherry-F)* embryos at 28 hpf, a TUNEL assay was performed at 48 hpi, and  
746 the CHT region of the embryos was imaged using confocal microscopy. A. The percentage of *Mm*  
747 clusters that were inside macrophages based on colocalization with the red fluorescent signal from  
748 mCherry. Statistical analysis was performed by two-tailed t-test. In the beclomethasone-treated  
749 group, the percentage of *Mm* clusters inside macrophages was significantly lower compared to the  
750 vehicle-treated group. B. The percentage of TUNEL-positive *Mm* clusters. Statistical analysis by two-  
751 tailed t-test showed that the beclomethasone-treated group had a significantly lower percentage of  
752 TUNEL+ *Mm* clusters. In panels A and B, each data point represents a single embryo and the means  $\pm$   
753 s.e.m. of data accumulated from three independent experiments are shown in red. Statistical  
754 significance is indicated by: \*\*  $P < 0.01$ . C. Representative confocal microscopy images of macrophage  
755 phagocytosis. Bacteria are shown in blue and macrophages in red. Arrowheads indicate intracellular  
756 bacterial clusters. Scale bar = 100  $\mu$ m. D. Representative confocal microscopy images of cell death  
757 (TUNEL+ cells in magenta) and *Mm* infection (bacteria in blue). Arrowheads indicate bacterial clusters  
758 overlapping with TUNEL+ cells. Scale bar = 100  $\mu$ m.

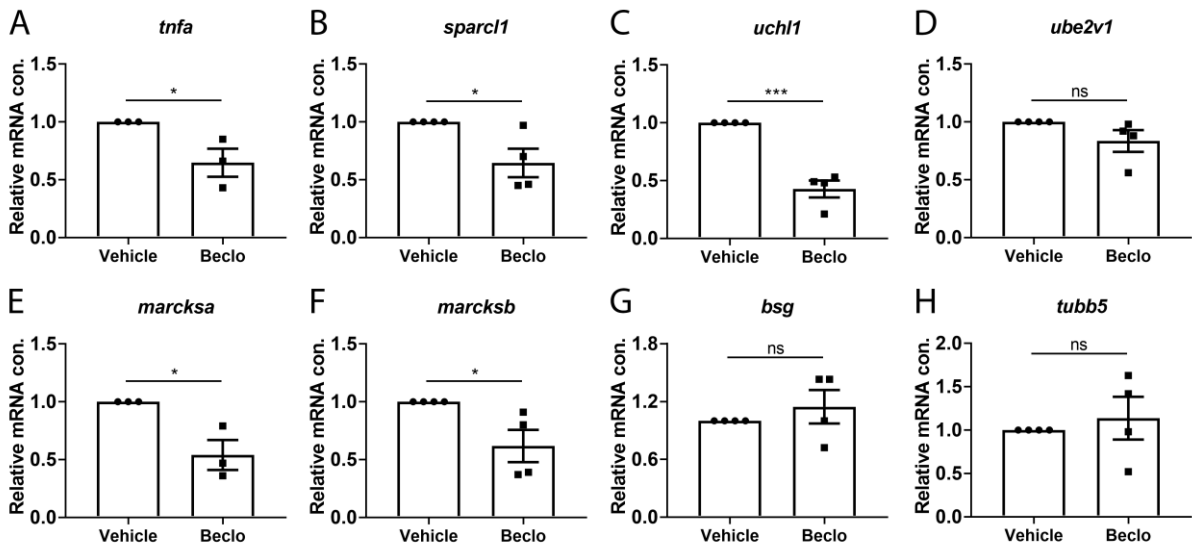

759

760 **Figure 6. Effect of beclomethasone on gene expression levels in FACS-sorted macrophages.** At 28  
761 hpf, *Tg(mpeg1:mCherry-F)* embryos were treated with vehicle or beclomethasone for two hours,  
762 after which macrophages were isolated by FACS sorting. Gene expression levels were determined in  
763 the sorted cells by qPCR for *tnfa* (A), *sparcl1* (B), *uchl1* (C), *ube2v1* (D), *marcksa* (E), *marcksb* (F), *bsg*  
764 (G) and *tubb5* (H). Statistical analysis by two-tailed t-test showed that the levels of *tnfa*, *sparcl1*,  
765 *uchl1*, *marcksa* and *marcksb* expression were significantly inhibited by beclomethasone treatment.  
766 Data shown are the means  $\pm$  s.e.m. of three or four independent experiments, and markers show  
767 averages of individual experiments. Statistical significance is indicated by: ns, non-significant; \*  
768  $P < 0.05$ ; \*\*\*  $P < 0.001$ .

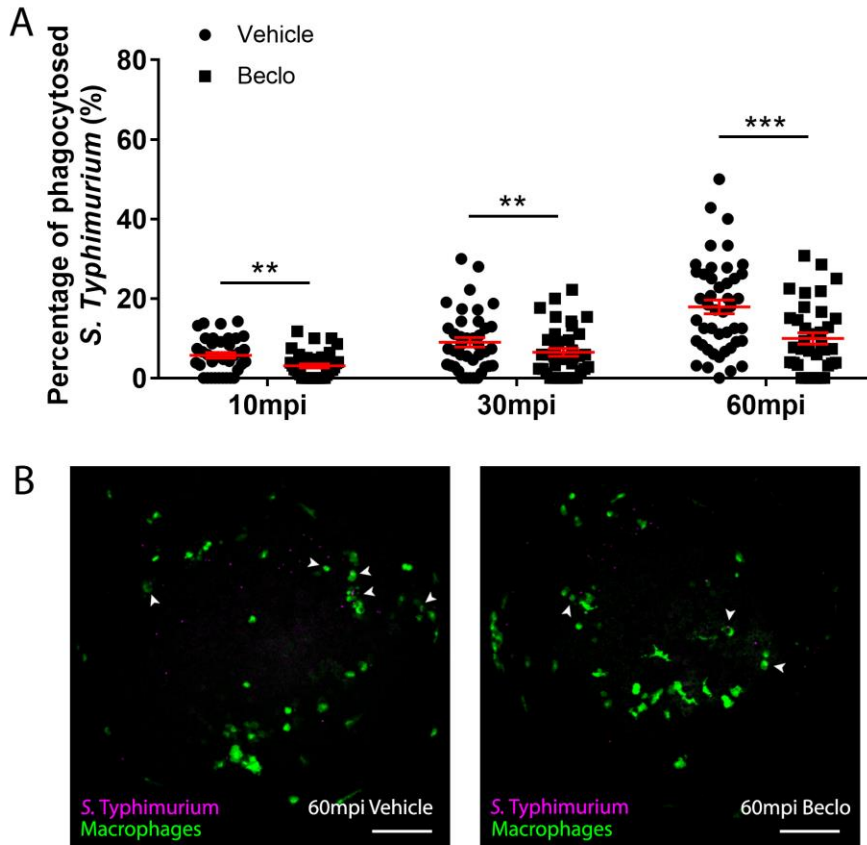

769

770 **Figure 7. Effect of beclomethasone on phagocytosis of *Salmonella Typhimurium*.** At 28 hpf  
771 *Tg(mpeg1:GFP)* embryos (vehicle- or beclomethasone-treated) were infected with *S. Typhimurium*  
772 through intravenous injection. At 10, 30, and 60 mpi, confocal microscopy images were taken of the  
773 yolk area, as indicated in Figure 4A, and the macrophage phagocytic capacity was determined. A.  
774 Percentage of phagocytosed *S. Typhimurium* at 10, 30 and 60 mpi. Statistical analysis, performed by  
775 fitting data to a beta inflated regression with Tukey's post hoc test, showed that the phagocytic  
776 activity of macrophages was significantly inhibited by beclomethasone treatment at 60 mpi, and not  
777 at other time points. Each data point represents a single embryo and the means  $\pm$  s.e.m. of data  
778 accumulated from three independent experiments are shown in red. Statistical significance is  
779 indicated by: ns, non-significant; \*\*\*\*  $P < 0.0001$ . B. Representative confocal microscopy images of  
780 infected vehicle- and beclomethasone-treated individuals at 60 mpi. Bacteria are shown in magenta,  
781 macrophages in green. Arrowheads indicate bacteria phagocytosed by macrophages. Scale bar = 100  
782  $\mu\text{m}$ .
